# Supplementary material for: Application and Evaluation of Interactive 3D PDF for Presenting and Sharing Planning Results for Liver Surgery in Clinical Routine
Source: PubMed Central journal article supplement (PMC4281211; doi:10.1371/journal.pone.0115697), 2014-12-31
Supplement: pone.0115697.s001.pdf [file pone.0115697.s001.pdf]

Part 1 – for all interviewees.

qualtrics.com

English

**Fraunhofer**  
MEVIS

**MeVis**  
MEDICAL SOLUTIONS

**FAU**  
FRIEDRICH-ALEXANDER  
UNIVERSITÄT  
ERLANGEN-NÜRNBERG

Thank you for taking the time to participate in our survey! Your contribution helps support our research and evaluation of the MeVis surgery planning results so that we can improve the presentation of the planning data.

Answering all questions will only take about 5 minutes. Your answers will be treated anonymously. Most of the questions are optional and can be skipped if you cannot, or do not want to, provide an answer.

If you are interested, we will be happy to share the final results of the survey with you. Information about receiving these results will be given at the end of the survey.

Please click [Start->] to begin.

Start >>

Q2.3

qualtrics.com

English

Please start by sharing some demographic information.

Please select your age.

- < 30 years
- 30 - 40 years
- 40 - 50 years
- > 50 years

Q2.4

Please select your specialization.

- Surgery
- Radiology
- Nuclear Medicine
- Other:

Q2.5

Please select your position that matches best.

- Resident
- Attending Physician
- Consultant
- Head of Department
- Other:

<< Previous    Next >>

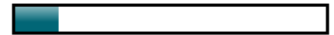

Q2.7

For which applications do you use MeVis Distant Services, and how many cases do you work on per year?  
 (Leave options blank if they do not apply.)

|                                     | Cases per year       |
|-------------------------------------|----------------------|
| Oncological resections              | <input type="text"/> |
| Living donor liver transplantations | <input type="text"/> |
| Follow-up evaluations               | <input type="text"/> |
| Other: <input type="text"/>         | <input type="text"/> |
| Other: <input type="text"/>         | <input type="text"/> |
| Other: <input type="text"/>         | <input type="text"/> |

Q2.8

How many liver surgery cases take place in your hospital per year?

- < 50
- 51 - 200
- 201 - 500
- > 500

<< Previous    Next >>

You receive the results of liver surgery planning as a 2D PDF with multiple pages, a 3D PDF with a single interactive page, and/or as a dataset for the Liver Viewer or Liver Explorer.

2D PDF

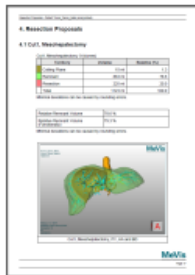

3D PDF

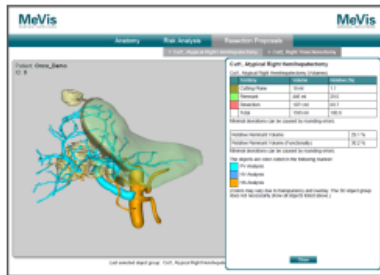

Liver Viewer / Liver Explorer

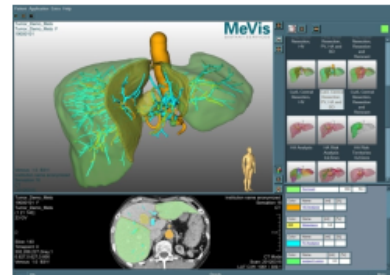

Q3.4

How often do you use each report format?

|                         | Always                | Often                 | Sometimes             | Rarely                | Never                 | I do not know this    |
|-------------------------|-----------------------|-----------------------|-----------------------|-----------------------|-----------------------|-----------------------|
| 2D PDF                  | <input type="radio"/> | <input type="radio"/> | <input type="radio"/> | <input type="radio"/> | <input type="radio"/> | <input type="radio"/> |
| 3D PDF                  | <input type="radio"/> | <input type="radio"/> | <input type="radio"/> | <input type="radio"/> | <input type="radio"/> | <input type="radio"/> |
| Liver Viewer / Explorer | <input type="radio"/> | <input type="radio"/> | <input type="radio"/> | <input type="radio"/> | <input type="radio"/> | <input type="radio"/> |

<< Previous    Next >>

Part 2a – for 3D PDF users only

(Participant did *not* select “Never” or “I do not know this” for question Q3.4 / Row “3D PDF”).

Q4.2

qualtrics.com

English

For what purposes do you use the 3D PDF?

- Deciding whether surgery is performed
- Patient information
- Decision about surgical strategy
- Personal / mental preparation for surgery
- Support during surgery
- Tumor board discussion
- Discussion with colleagues
- Education / training
- Case presentation (e.g. conference)
- Other:

Q4.3

Do you take advantage of the possibility to exchange the 3D PDF with others?

- No
- Yes, by e-mail
- Yes, by a hardware storage medium (e.g. USB storage)
- Yes, by:

Next >>

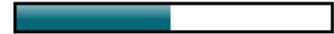

Q4.5

**At which workplace/device do you watch or present the 3D PDF?**

- At one stationary workplace (e.g. an office PC)
- At multiple stationary workplaces
- In a conference room (e.g. using video projector or large screen)
- At a laptop / notebook
- On a tablet PC
- Other:

Q4.6

**Which 3D PDF presentation options do you use in the operating room?**

- None
- Paper printouts with pre-defined views
- Paper printouts with customized views
- Monitor of a PC
- Large screen (wall-mounted)
- Laptop / notebook
- Tablet PC
- Other:

<< Previous

Next >>

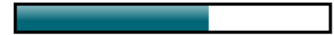

Q4.8

Please rate the statement: The following functions and characteristics of the 3D PDFs are useful.

|                                                                        | Agree                 | Somewhat agree        | Somewhat disagree     | Disagree              | I cannot assess       |
|------------------------------------------------------------------------|-----------------------|-----------------------|-----------------------|-----------------------|-----------------------|
| Interactive zooming and viewing of the 3D model from all directions    | <input type="radio"/> | <input type="radio"/> | <input type="radio"/> | <input type="radio"/> | <input type="radio"/> |
| Interactive selection of different views and resection proposals       | <input type="radio"/> | <input type="radio"/> | <input type="radio"/> | <input type="radio"/> | <input type="radio"/> |
| Interactive show/hide of the liver parenchyma                          | <input type="radio"/> | <input type="radio"/> | <input type="radio"/> | <input type="radio"/> | <input type="radio"/> |
| Tables and informational text for case summary                         | <input type="radio"/> | <input type="radio"/> | <input type="radio"/> | <input type="radio"/> | <input type="radio"/> |
| Tables and informational text for the currently selected 3D view       | <input type="radio"/> | <input type="radio"/> | <input type="radio"/> | <input type="radio"/> | <input type="radio"/> |
| Summary of all information in one page (without scrolling)             | <input type="radio"/> | <input type="radio"/> | <input type="radio"/> | <input type="radio"/> | <input type="radio"/> |
| Grouping of all information in one file                                | <input type="radio"/> | <input type="radio"/> | <input type="radio"/> | <input type="radio"/> | <input type="radio"/> |
| Independence of pre-installed dedicated software (except Adobe Reader) | <input type="radio"/> | <input type="radio"/> | <input type="radio"/> | <input type="radio"/> | <input type="radio"/> |
| Other:<br><input type="text"/>                                         | <input type="radio"/> | <input type="radio"/> | <input type="radio"/> | <input type="radio"/> | <input type="radio"/> |
| Other:<br><input type="text"/>                                         | <input type="radio"/> | <input type="radio"/> | <input type="radio"/> | <input type="radio"/> | <input type="radio"/> |

<< Previous    Next >>

Q4.10

qualtrics.com

English

**Please rate the statement: The following functions and properties would be useful extensions for the 3D PDF.**

|                                                             | Agree                 | Somewhat agree        | Somewhat disagree     | Disagree              | I cannot assess       |
|-------------------------------------------------------------|-----------------------|-----------------------|-----------------------|-----------------------|-----------------------|
| Overlay of planning results with original radiological data | <input type="radio"/> | <input type="radio"/> | <input type="radio"/> | <input type="radio"/> | <input type="radio"/> |
| Individual resection planning by myself / in my hospital    | <input type="radio"/> | <input type="radio"/> | <input type="radio"/> | <input type="radio"/> | <input type="radio"/> |
| Other:<br><input type="text"/>                              | <input type="radio"/> | <input type="radio"/> | <input type="radio"/> | <input type="radio"/> | <input type="radio"/> |
| Other:<br><input type="text"/>                              | <input type="radio"/> | <input type="radio"/> | <input type="radio"/> | <input type="radio"/> | <input type="radio"/> |

Q4.12

qualtrics.com

English

**Please rate the statement: The 3D PDF is easy to use in the following situations.**

|                                      | Agree                 | Somewhat agree        | Somewhat disagree     | Disagree              | I cannot assess       |
|--------------------------------------|-----------------------|-----------------------|-----------------------|-----------------------|-----------------------|
| Opening / viewing                    | <input type="radio"/> | <input type="radio"/> | <input type="radio"/> | <input type="radio"/> | <input type="radio"/> |
| Download from the MDS server         | <input type="radio"/> | <input type="radio"/> | <input type="radio"/> | <input type="radio"/> | <input type="radio"/> |
| Exchange with / forwarding to others | <input type="radio"/> | <input type="radio"/> | <input type="radio"/> | <input type="radio"/> | <input type="radio"/> |
| Other:<br><input type="text"/>       | <input type="radio"/> | <input type="radio"/> | <input type="radio"/> | <input type="radio"/> | <input type="radio"/> |
| Other:<br><input type="text"/>       | <input type="radio"/> | <input type="radio"/> | <input type="radio"/> | <input type="radio"/> | <input type="radio"/> |

Q4.13

**Would you like to use the planning data with other 3D media?**

No

Yes, online / web viewer

Yes, tablet viewer

Yes, integrated into PACS

Yes, other:

<< Previous    Next >>

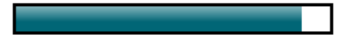

Q4.15

Finally, rate the 3D PDF according to the contrasting word pairs below. Mark the circle closer to the word you spontaneously agree with more when you think about using the 3D PDF.

All word pairs shall have a marked choice; even if you are unsure about your agreement with any of the listed attributes or they do not apply to your experiences, please select an option.

|                    |                       |                       |                       |                       |                       |                       |                       |                    |
|--------------------|-----------------------|-----------------------|-----------------------|-----------------------|-----------------------|-----------------------|-----------------------|--------------------|
| annoying           | <input type="radio"/> | <input type="radio"/> | <input type="radio"/> | <input type="radio"/> | <input type="radio"/> | <input type="radio"/> | <input type="radio"/> | enjoyable          |
| not understandable | <input type="radio"/> | <input type="radio"/> | <input type="radio"/> | <input type="radio"/> | <input type="radio"/> | <input type="radio"/> | <input type="radio"/> | understandable     |
| creative           | <input type="radio"/> | <input type="radio"/> | <input type="radio"/> | <input type="radio"/> | <input type="radio"/> | <input type="radio"/> | <input type="radio"/> | dull               |
| easy to learn      | <input type="radio"/> | <input type="radio"/> | <input type="radio"/> | <input type="radio"/> | <input type="radio"/> | <input type="radio"/> | <input type="radio"/> | difficult to learn |
| fast               | <input type="radio"/> | <input type="radio"/> | <input type="radio"/> | <input type="radio"/> | <input type="radio"/> | <input type="radio"/> | <input type="radio"/> | slow               |
| inventive          | <input type="radio"/> | <input type="radio"/> | <input type="radio"/> | <input type="radio"/> | <input type="radio"/> | <input type="radio"/> | <input type="radio"/> | conventional       |
| good               | <input type="radio"/> | <input type="radio"/> | <input type="radio"/> | <input type="radio"/> | <input type="radio"/> | <input type="radio"/> | <input type="radio"/> | bad                |
| complicated        | <input type="radio"/> | <input type="radio"/> | <input type="radio"/> | <input type="radio"/> | <input type="radio"/> | <input type="radio"/> | <input type="radio"/> | easy               |
| unlikable          | <input type="radio"/> | <input type="radio"/> | <input type="radio"/> | <input type="radio"/> | <input type="radio"/> | <input type="radio"/> | <input type="radio"/> | pleasing           |
| usual              | <input type="radio"/> | <input type="radio"/> | <input type="radio"/> | <input type="radio"/> | <input type="radio"/> | <input type="radio"/> | <input type="radio"/> | leading edge       |
| unpleasant         | <input type="radio"/> | <input type="radio"/> | <input type="radio"/> | <input type="radio"/> | <input type="radio"/> | <input type="radio"/> | <input type="radio"/> | pleasant           |
| inefficient        | <input type="radio"/> | <input type="radio"/> | <input type="radio"/> | <input type="radio"/> | <input type="radio"/> | <input type="radio"/> | <input type="radio"/> | efficient          |
| clear              | <input type="radio"/> | <input type="radio"/> | <input type="radio"/> | <input type="radio"/> | <input type="radio"/> | <input type="radio"/> | <input type="radio"/> | confusing          |
| impractical        | <input type="radio"/> | <input type="radio"/> | <input type="radio"/> | <input type="radio"/> | <input type="radio"/> | <input type="radio"/> | <input type="radio"/> | practical          |
| organized          | <input type="radio"/> | <input type="radio"/> | <input type="radio"/> | <input type="radio"/> | <input type="radio"/> | <input type="radio"/> | <input type="radio"/> | cluttered          |
| attractive         | <input type="radio"/> | <input type="radio"/> | <input type="radio"/> | <input type="radio"/> | <input type="radio"/> | <input type="radio"/> | <input type="radio"/> | unattractive       |
| friendly           | <input type="radio"/> | <input type="radio"/> | <input type="radio"/> | <input type="radio"/> | <input type="radio"/> | <input type="radio"/> | <input type="radio"/> | unfriendly         |
| conservative       | <input type="radio"/> | <input type="radio"/> | <input type="radio"/> | <input type="radio"/> | <input type="radio"/> | <input type="radio"/> | <input type="radio"/> | innovative         |

<< Previous    Next >>



Part 2b – for non 3D PDF users only

(Participant selected “Never” or “I do not know this” for question Q3.4 / Row “3D PDF”).

Q5.2

qualtrics.com

English

Why do you not use the 3D PDF?

- I don't know it.
- I have not yet tried using it.
- Handling is too complicated.
- Cannot be displayed / does not work.
- I do not see any advantages over the 2D PDF.
- I do not see any advantages over the Liver Viewer / Liver Explorer.
- Other:

Next >>

Q5.4

qualtrics.com

English

The 3D PDF provides some functions and features not offered by the 2D PDF or the Liver Viewer.

***If you were to use the 3D PDF - please rate the statement: The following functions and characteristics of the 3D PDFs are useful.***

|                                                                        | Agree                 | Somewhat agree        | Somewhat disagree     | Disagree              | I cannot assess       |
|------------------------------------------------------------------------|-----------------------|-----------------------|-----------------------|-----------------------|-----------------------|
| Interactive zooming and viewing of the 3D model from all directions    | <input type="radio"/> | <input type="radio"/> | <input type="radio"/> | <input type="radio"/> | <input type="radio"/> |
| Interactive selection of different views and resection proposals       | <input type="radio"/> | <input type="radio"/> | <input type="radio"/> | <input type="radio"/> | <input type="radio"/> |
| Interactive show/hide of the liver parenchyma                          | <input type="radio"/> | <input type="radio"/> | <input type="radio"/> | <input type="radio"/> | <input type="radio"/> |
| Tables and informational text for case summary                         | <input type="radio"/> | <input type="radio"/> | <input type="radio"/> | <input type="radio"/> | <input type="radio"/> |
| Tables and informational text for the currently selected 3D view       | <input type="radio"/> | <input type="radio"/> | <input type="radio"/> | <input type="radio"/> | <input type="radio"/> |
| Summary of all information in one page (without scrolling)             | <input type="radio"/> | <input type="radio"/> | <input type="radio"/> | <input type="radio"/> | <input type="radio"/> |
| Grouping of all information in one file                                | <input type="radio"/> | <input type="radio"/> | <input type="radio"/> | <input type="radio"/> | <input type="radio"/> |
| Independence of pre-installed dedicated software (except Adobe Reader) | <input type="radio"/> | <input type="radio"/> | <input type="radio"/> | <input type="radio"/> | <input type="radio"/> |

<< Previous    Next >>

Part 3 – for all interviewees.

Q6.3

qualtrics.com

English ▾

**Thank you very much** for your time and valuable answers that will help us with our aim to improve the presentation of MeVis surgery planning results.

Do you have further suggestions or comments?

Please click [Save Result] to finish the survey.

Save Result

qualtrics.com

**Thank you, your answers have been recorded.**

If you are interested in the results of this survey, please send an e-mail to [mds-query@mevis.de](mailto:mds-query@mevis.de).

Thank you very much again for your participation!

Your team of Fraunhofer MEVIS, MeVis Distant Services, and the University of Erlangen-Nuremberg.
